# Supplementary material for: MicroRNA-27a/b-3p and PPARG regulate SCAMP3 through a feed-forward loop during adipogenesis
Source: PubMed Central journal article supplement (PMC6761119; doi:10.1038/s41598-019-50210-3), 2019-09-25

# Title: MicroRNA-27a/b-3p and PPARG regulate SCAMP3 through a feed forward loop during adipogenesis

**Authors:** Agné Kulyté, Kelvin Ho Man Kwok, Michiel de Hoon, Piero Carninci, Yoshihide Hayashizaki, Peter Arner, Erik Arner

## Supplemental figure 1. miR-27a-3p and miR-27b-3p regulate SCAMP3 in proliferating hASCs.

miR-27a-3p and miR-27b-3p were overexpressed in proliferating hASCs and expression of SCAMP3 was assessed by RT-qPCR. Expression of genes was normalized to the reference gene LRP10. Results are based on two biological/independent experiments. Results were analyzed using t-test and presented in fold change  $\pm$  SD relative to negative control of a corresponding time point (Neg C). \*\*\*P < 0.005, \*\*P < 0.01, \*P < 0.05.

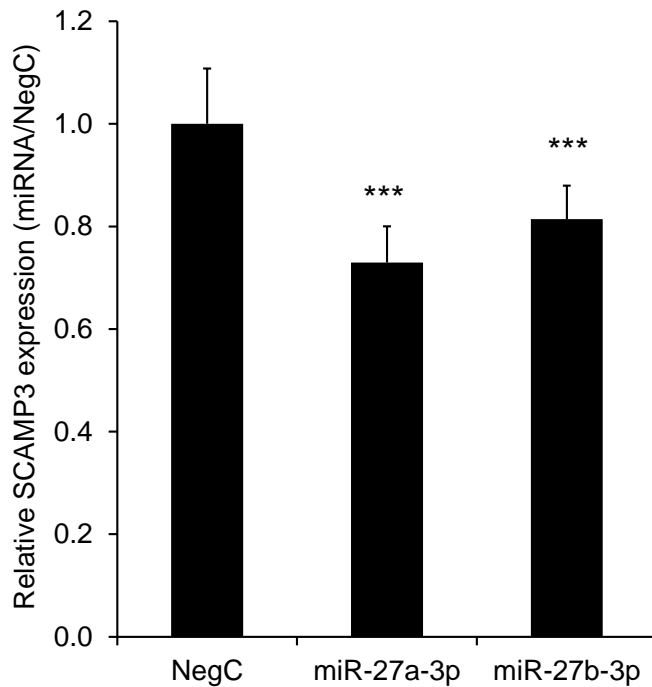

Supplemental figure 2. Images of hASCs at day 9 transfected with siRNA NegC, siSCAMP3 and siPPARG and differentiated *in vitro*.

Nuclei (Hoechst)      Lipids (Bodipy)      Overlay

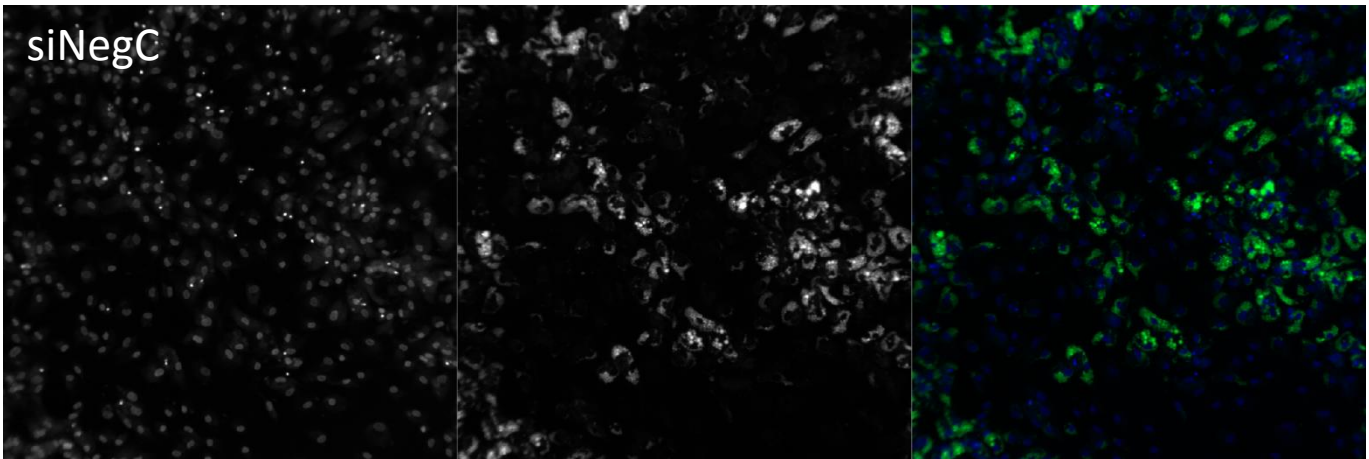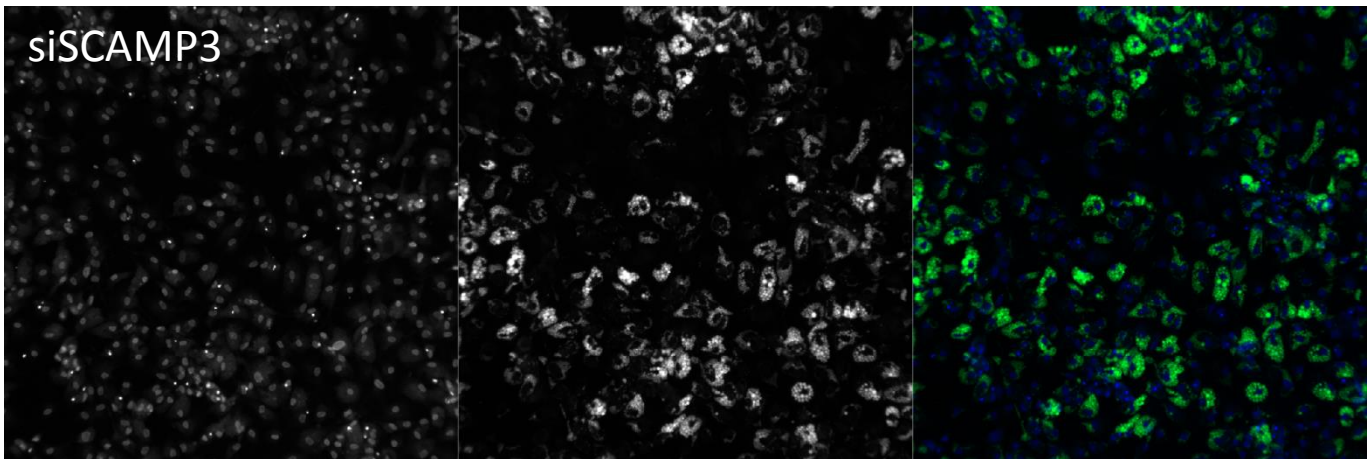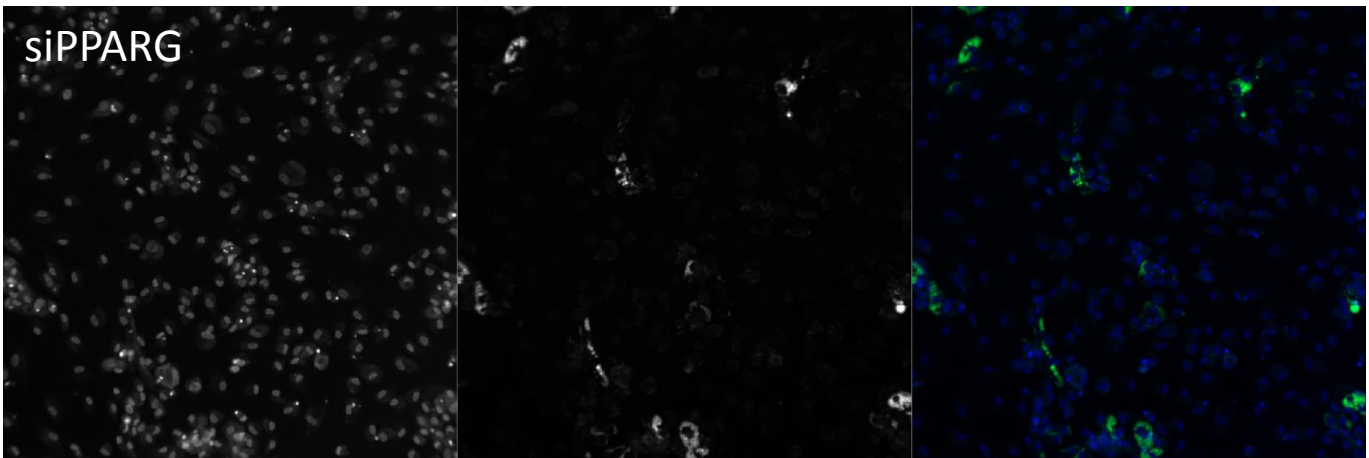

**Supplemental figure 3. Expression of SCAMP3 in FASC sorted human adipose tissue stromal vascular fraction.** Data retrieved from URL <https://www.ncbi.nlm.nih.gov/geo/query/acc.cgi?acc=GSE80654>.

Adipose tissue from 6 patients was collagenase treated and adipocytes separated from the stromal vascular fraction (SVF). SVF was then FACS sorted for the following fractions CD45-/CD34+/CD31+ (endothelial), CD45-/CD34+/CD31- (progenitor), CD45+/CD14+ (monocyte/macrophage), CD45+/CD14-(Leukocyte). RNA was isolated from adipocytes, SVF, progenitor, macrophage/monocyte and leukocyte fractions and analyzed on the Affymetrix Human Transcriptome 2.0 array. \*\*\*P < 0.005.

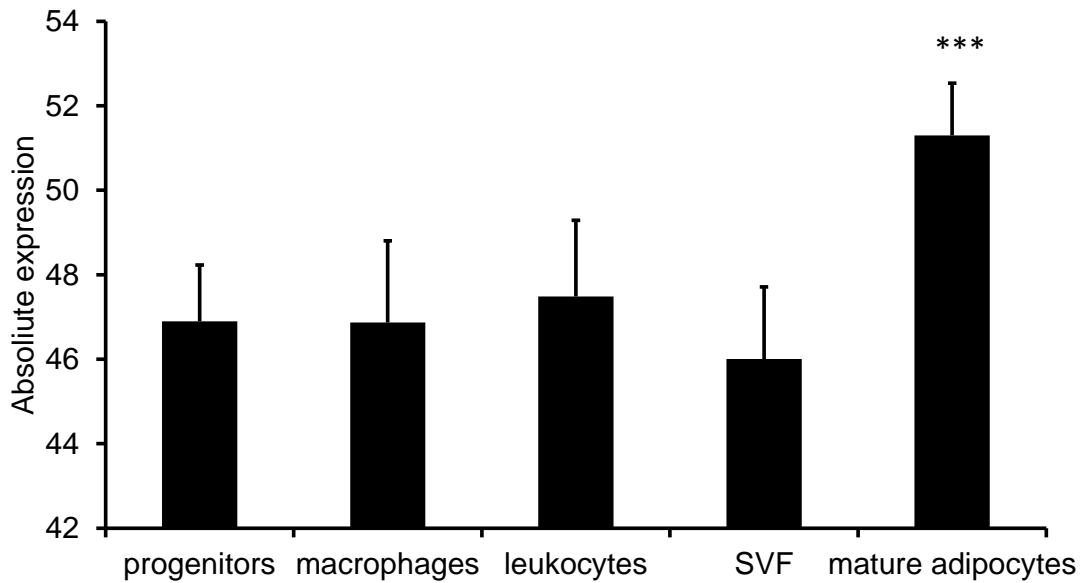

Supplement: 41598_2019_50210_MOESM1_ESM.pdf [file 41598_2019_50210_MOESM1_ESM.pdf]
